# Supplementary material for: The use of banana peel as a low-cost adsorption material for removing hexavalent chromium from tannery wastewater: optimization, kinetic and isotherm study, and regeneration aspects
Source: Royal Society of Chemistry journal article supplement (doi:10.1039/d3ra07476e), 2024-01-01
Supplement: d3ra07476e1.pdf [file d3ra07476e1.pdf]

## Supplementary materials

### *BET analyses of raw and activated BP*

Horiba Instruments, Inc.  
 SA-9600 Series Surface Area Analyzer

Analysis Report  
 Jan/05/2022

|                                     |                             |
|-------------------------------------|-----------------------------|
| Customer : Bereket                  | Operator ID : ARA           |
| Description : Activated banana peel | Analysis Date : Jan/05/2022 |
| Filename : Run 1                    | Analysis Time : 10:36:59    |

#### Condition Settings

|                       |                               |
|-----------------------|-------------------------------|
| Room Temp : 23.0 (°C) | Atm. Pres : 700.0 (mm)        |
| Gas Used : Nitrogen   | Gas Conc : 50.0, 30.0, 20.0 % |

|                                   | Channel: 1 |       | Channel: 2  |       | Channel: 3 |       |
|-----------------------------------|------------|-------|-------------|-------|------------|-------|
|                                   | Raw<br>1   |       | Before<br>2 |       | After<br>3 |       |
| Sample Name                       |            |       |             |       |            |       |
| Tube Number                       |            |       |             |       |            |       |
| Tare Weight                       | 10.0760    | (gm)  | 10.0150     | (gm)  | 10.1120    | (gm)  |
| Sample Weight                     | 10.8470    | (gm)  | 10.8140     | (gm)  | 10.9150    | (gm)  |
| Degas Temp.                       | 110        | (°C)  | 110         | (°C)  | 110        | (°C)  |
| Degas Time                        | 120        | (min) | 120         | (min) | 120        | (min) |
| Surface Area (M <sup>2</sup> /gm) | 10         |       | 200.210     |       | 80.593     |       |
| Slope                             | 21656.926  |       | 137.503     |       | 506.287    |       |
| Intercept                         | -1254.115  |       | -8.966      |       | -15.684    |       |
| Vm                                | 0.000      |       | 0.008       |       | 0.002      |       |
| BET Const                         | -16.269    |       | -14.337     |       | -31.280    |       |
| Pearson Coef                      | 0.996      |       | 0.997       |       | 0.999      |       |
| X[1] - 0.449                      | 8366.942   |       | 53.281      |       | 212.875    |       |
| X[2] - 0.269                      | 4866.978   |       | 26.415      |       | 116.485    |       |
| X[3] - 0.179                      | 2439.438   |       | 16.807      |       | 77.947     |       |

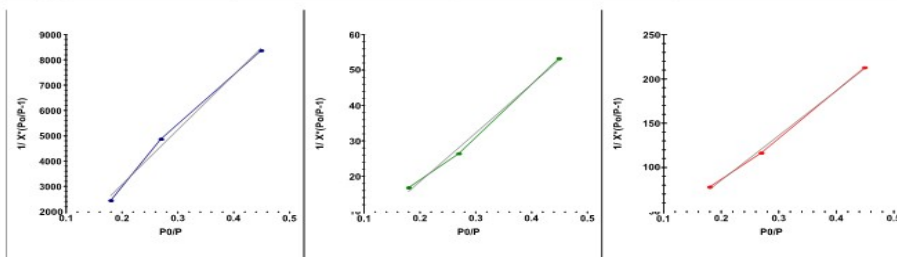

### *IR Spectrum Table by Frequency Range*

| Absorption (cm <sup>-1</sup> ) | Appearance | Group          | Compound Class                         |
|--------------------------------|------------|----------------|----------------------------------------|
| 3350-3310                      | Medium     | N-H stretching | secondary amine                        |
| 2830-2695                      | Medium     | C-H stretching | Aldehyde                               |
| 1725-1705                      | Strong     | C=O stretching | aliphatic ketone                       |
| 1650-1600                      | medium     | C=C stretching | conjugated alkene                      |
| 1650-1580                      | medium     | N-H bending    | Amine                                  |
| 1650-1566                      | medium     | C=C stretching | cyclic alkene                          |
| 1620-1610                      | Strong     | C=C stretching | $\alpha$ , $\beta$ -unsaturated ketone |
| 1390-1380                      | medium     | C-H bending    | Aldehyde                               |
| 1385-1380                      | medium     | C-H bending    | Alkane                                 |
| 1420-1330                      | medium     | O-H bending    | Alcohol                                |
| 1415-1380                      | Strong     | S=O stretching | Sulfate                                |
| 1410-1380                      | Strong     | S=O stretching | sulfonyl chloride                      |

|           |        |                |                |
|-----------|--------|----------------|----------------|
| 1400-1000 | Strong | C-F stretching | flora compound |
| 1390-1310 | medium | O-H bending    | Phenol         |
| 1070-1030 | strong | S=O stretching | Sulfoxide      |
